# Supplementary material for: Psychiatrists’ Knowledge of Their Patients’ Job Functioning
Source: Atypon-hosted journal article supplement (doi:10.1176/appi.ps.640421), 2013-04-01
Supplement: 395_ds001.pdf [file 395_ds001.pdf]

## Online Appendix

### **Members of the Psychopathology Committee of the Group for Advancement of Psychiatry, and authors of the letter**

David Adler, M.D. (Chair)  
Marcia Valenstein M.D.  
Lisa B. Dixon, M.D., M.P.H.  
Steve Koh, M.D.  
David Oslin, M.D.  
Michael First, M.D.  
Jonathan Avery, M.D.  
Samuel Siris, M.D.  
Ilana Nossel, M.D.  
Ann Hackman, M.D.  
Jeffrey Berlant, M.D.  
Beth Goldman, M.D.

### **Additional information about the survey**

**Sample:** A Survey Monkey convenience sample from 4 list serves: the Group for Advancement of Psychiatry, Massachusetts Psychiatric Society, American College of Psychoanalysts, and American Association of Psychiatric Administrators, with a total N of approximately 1700. 173 individuals responded to two invitations separated by two weeks for a 10% response rate. 136 psychiatrists answered work related questions for 269 patients. 128 gave their age, gender and training. Mean age was 59 with 25% over 64 and 25% under 45. The sample included 66% males (N=84) and 34% females (N=44). 95% (N=121) considered themselves adult psychiatrists but that included some of the N=26 who said they were also child psychiatrists.

**Work Questionnaire:** The work survey was adapted from the Work Limitations Questionnaire (WLQ; adapted version available) (4), a validated measure of work functioning. The survey had 10 specific work-related questions about two anonymous employed patients and 4 general questions about their overall rating of importance of this knowledge using a likert scale. The 10 questions asked about the percentage of time the patients had difficulty at work in the following 10 areas: a) difficulty performing usual work tasks, b) missed full or part days, c) worked less than the required hours; had difficulty d) getting going at the beginning of the day, e) starting on the job as soon as they arrived at work, f) handling the physical aspects of work, g) concentration, h) speaking with people, i) handling the work load and g) finishing job tasks on time. Tools like the WLQ provide a more sophisticated appreciation of work impairment and a framework to develop treatment strategies to address work issues and to monitor treatment progress in the work arena.
